# Supplementary material
Source: Hindawi journal article supplement (doi:10.1155/2012/130491)

**Table S1:** Microarray expression data sets that were used for the network training.

| GEO accession number | Number of Samples | Platform                                  |
|----------------------|-------------------|-------------------------------------------|
| GSE9745              | 80                | GPL6049 Arizona Gallus gallus 20.7K       |
| GSE8812              | 24                | GPL1731 DEL-MAR 14K Integrated Systems    |
| GSE7254              | 40                | GPL1731 DEL-MAR 14K Integrated Systems    |
| GSE5205              | 23                | GPL1731 DEL-MAR 14K Integrated Systems    |
| GSE5067              | 48                | GPL1731 DEL-MAR 14K Integrated Systems    |
| GSE10052             | 8                 | GPL1731 DEL-MAR 14K Integrated Systems    |
| GSE10538             | 24                | GPL3213 Affymetrix GeneChip Chicken Array |

**Table S2:** Top 20 of the most connected genes in the network. The level of differential expression is shown by FDR p-values for the four tissue/stage conditions abbreviated as: G:gonad; B:brain; E:embryo; AD:adult.

| Gene                                                                                                                                                                | Connectivity | FDR G/E  | FDR G/AD | FDR B/E  | FDR B/AD |
|---------------------------------------------------------------------------------------------------------------------------------------------------------------------|--------------|----------|----------|----------|----------|
| ENSGALG00000002569                                                                                                                                                  | 1316         | 4.00E-03 | 1.90E-05 | 9.94E-01 | 4.13E-01 |
| GTP-binding nuclear protein Ran (GTPase Ran) (Ras-like protein TC4).                                                                                                |              |          |          |          |          |
| ENSGALG00000006512                                                                                                                                                  | 1077         | 9.52E-01 | 3.47E-01 | 9.95E-01 | 9.29E-01 |
| heat shock cognate 70                                                                                                                                               |              |          |          |          |          |
| ENSGALG00000005931                                                                                                                                                  | 900          | 4.24E-01 | 9.47E-05 | 9.94E-01 | 2.84E-01 |
| RuvB-like 1                                                                                                                                                         |              |          |          |          |          |
| ENSGALG00000004707                                                                                                                                                  | 895          | 2.00E-02 | 1.00E-02 | 9.94E-01 | 9.33E-01 |
| Exportin-2 (Exp2)(Importin-alpha re-exporter)(Chromosome segregation 1-like protein)(Cellular apoptosis susceptibility protein)                                     |              |          |          |          |          |
| ENSGALG00000008812                                                                                                                                                  | 882          | 3.50E-01 | 5.40E-02 | 9.94E-01 | 6.38E-01 |
| chaperonin containing TCP1, subunit 4 (delta)                                                                                                                       |              |          |          |          |          |
| ENSGALG00000014395                                                                                                                                                  | 849          | 6.30E-01 | 3.68E-04 | 9.98E-01 | 7.63E-01 |
| DEAH (Asp-Glu-Ala-His) box polypeptide 15                                                                                                                           |              |          |          |          |          |
| ENSGALG00000014450                                                                                                                                                  | 849          | 3.68E-01 | 2.16E-01 | 9.98E-01 | 8.91E-01 |
| poly(A) binding protein, cytoplasmic 1                                                                                                                              |              |          |          |          |          |
| ENSGALG00000007711                                                                                                                                                  | 848          | 4.94E-01 | 5.00E-03 | 9.94E-01 | 8.03E-01 |
| ribosomal protein L4                                                                                                                                                |              |          |          |          |          |
| ENSGALG00000013041                                                                                                                                                  | 828          | 4.30E-02 | 3.30E-01 | 9.96E-01 | 7.22E-01 |
| chaperonin containing TCP1, subunit 5 (epsilon)                                                                                                                     |              |          |          |          |          |
| ENSGALG00000009975                                                                                                                                                  | 820          | 6.98E-01 | 8.54E-05 | 1.00E+00 | 8.93E-01 |
| chaperonin containing TCP1, subunit 2 (beta)                                                                                                                        |              |          |          |          |          |
| ENSGALG00000003046                                                                                                                                                  | 817          | 1.46E-01 | 6.04E-01 | 9.95E-01 | 9.43E-01 |
| Proteasome subunit alpha type-4 (EC 3.4.25.1)(Proteasome component C9)(Macropain subunit C9)(Multicatalytic endopeptidase complex subunit C9)(Proteasome subunit L) |              |          |          |          |          |
| ENSGALG00000011174                                                                                                                                                  | 811          | 3.50E-02 | 1.32E-01 | 9.94E-01 | 8.89E-01 |
| proteasome (prosome, macropain) subunit, beta type, 1                                                                                                               |              |          |          |          |          |
| ENSGALG00000004269                                                                                                                                                  | 794          | 8.50E-02 | 2.72E-04 | 9.94E-01 | 9.41E-01 |
| PREDICTED: Gallus gallus similar to Prt1 homolog (LOC769783), mRNA.                                                                                                 |              |          |          |          |          |
| ENSGALG00000000454                                                                                                                                                  | 793          | 3.00E-03 | 1.33E-01 | 9.94E-01 | 5.46E-01 |
| Importin subunit beta-1 (Karyopherin subunit beta-1)(Nuclear factor P97)(Importin-90)                                                                               |              |          |          |          |          |
| ENSGALG00000006910                                                                                                                                                  | 785          | 2.44E-01 | 5.90E-02 | 9.96E-01 | 8.36E-01 |
| inosine monophosphate dehydrogenase 2                                                                                                                               |              |          |          |          |          |
| ENSGALG00000009913                                                                                                                                                  | 776          | 8.30E-02 | 1.40E-02 | 9.94E-01 | 9.93E-01 |
| Hypothetical protein.                                                                                                                                               |              |          |          |          |          |

|                                                                                                                                                                                     |     |          |          |          |          |
|-------------------------------------------------------------------------------------------------------------------------------------------------------------------------------------|-----|----------|----------|----------|----------|
| ENSGALG0000009325                                                                                                                                                                   | 750 | 3.00E-03 | 1.87E-05 | 9.94E-01 | 2.62E-01 |
| GTP-binding protein PTD004                                                                                                                                                          |     |          |          |          |          |
| ENSGALG0000000065                                                                                                                                                                   | 749 | na       | na       | na       | na       |
| proteasome alpha 5 subunit                                                                                                                                                          |     |          |          |          |          |
| ENSGALG00000010060                                                                                                                                                                  | 738 | 5.00E-03 | 2.30E-04 | 9.94E-01 | 8.26E-01 |
| Proteasome subunit alpha type-6 (EC 3.4.25.1)(Proteasome iota chain)(Macropain iota chain)(Multicatalytic endopeptidase complex iota chain)(27 kDa prosomal protein)(PROS-27)(p27K) |     |          |          |          |          |
| ENSGALG00000008684                                                                                                                                                                  | 728 | 2.29E-01 | 8.85E-05 | 9.94E-01 | 7.45E-01 |
| Eukaryotic initiation factor 4A-II (EC 3.6.1.-) (ATP-dependent RNA helicase eIF4A-2) (eIF4A-II) (eIF-4A-II).                                                                        |     |          |          |          |          |

**Table S3:** Top 20 most sex-biased hub genes for each tissue/stage condition. Genes were first ranked according to sex bias or connectivity separately, and then re-ranked according to the sum of both ranks.

| <b>Embryonic gonad</b> |                                                                                                              |                     |                 |
|------------------------|--------------------------------------------------------------------------------------------------------------|---------------------|-----------------|
|                        | <b>Gene</b>                                                                                                  | <b>Connectivity</b> | <b>log2 m/f</b> |
| 1                      | ENSGALG00000010439, TUBA3E, tubulin, alpha 3e                                                                | 426                 | -2.40           |
| 2                      | ENSGALG00000006885, RASH, GTPase HRas                                                                        | 458                 | 1.13            |
| 3                      | ENSGALG00000010235, DDX19B, DEAD (Asp-Glu-Ala-As) box polypeptide 19                                         | 498                 | 0.93            |
| 4                      | ENSGALG00000003914, CALR3, Calreticulin-3                                                                    | 249                 | -2.92           |
| 5                      | ENSGALG00000008462, CDK3, Cell division protein kinase 3                                                     | 189                 | -3.66           |
| 6                      | ENSGALG00000000086, TIMM17A, translocase of inner mitochondrial membrane 17 homolog A                        | 197                 | -2.39           |
| 7                      | ENSGALG00000006110, PLK1, polo-like kinase 1                                                                 | 336                 | 1.10            |
| 8                      | ENSGALG00000009844, ACTC1, actin, alpha, cardiac muscle 1                                                    | 197                 | 3.22            |
| 9                      | ENSGALG00000016676, MCM3, minichromosome maintenance complex component 3                                     | 318                 | 1.00            |
| 10                     | ENSGALG00000004325, P4HA1, prolyl 4-hydroxylase, alpha polypeptide I                                         | 156                 | 1.26            |
| 11                     | ENSGALG00000001992, PKM2, pyruvate kinase, muscle                                                            | 468                 | 0.72            |
| 12                     | ENSGALG00000002797, Q5ZIZ0, 6-phosphogluconate dehydrogenase, decarboxylating                                | 216                 | 1.01            |
| 13                     | ENSGALG00000007611, RPL35A, ribosomal protein L35a                                                           | 376                 | 0.91            |
| 14                     | ENSGALG00000009312, RPL22L1, ribosomal protein L22-like 1                                                    | 132                 | 1.26            |
| 15                     | ENSGALG00000006520, MYH11, myosin, heavy chain 11, smooth muscle                                             | 67                  | 3.58            |
| 16                     | ENSGALG00000000681, PAK1, p21 protein (Cdc42/Rac)-activated kinase 1                                         | 47                  | 2.75            |
| 17                     | ENSGALG00000014331, FKBP4, FK506 binding protein 4, 59kDa                                                    | 272                 | 0.81            |
| 18                     | ENSGALG00000007719, SHANK2, SH3 and multiple ankyrin repeat domains 2                                        | 76                  | 2.95            |
| 19                     | ENSGALG00000007662, SPO11, meiotic protein covalently bound to DSB                                           | 37                  | -5.22           |
| 20                     | ENSGALG00000010255, NASP, nuclear autoantigenic sperm protein (histone-binding)                              | 97                  | 1.59            |
| <b>Adult gonad</b>     |                                                                                                              |                     |                 |
|                        | <b>Gene</b>                                                                                                  | <b>Connectivity</b> | <b>log2 m/f</b> |
| 1                      | ENSGALG00000016887, IPO5, importin 5                                                                         | 654                 | 3.26            |
| 2                      | ENSGALG00000010439, TUBA3E, tubulin, alpha 3e                                                                | 426                 | 6.45            |
| 3                      | ENSGALG00000004809, PPIF, peptidylprolyl isomerase F                                                         | 369                 | -3.92           |
| 4                      | ENSGALG00000012159, ACTR3, ARP3 actin-related protein 3 homolog                                              | 557                 | -2.79           |
| 5                      | ENSGALG00000008462, CDK3, Cell division protein kinase 3                                                     | 189                 | 5.02            |
| 6                      | ENSGALG00000013056, TUBA4A, tubulin, alpha 4a                                                                | 159                 | 9.57            |
| 7                      | ENSGALG00000008163, PSME4, proteasome (prosome, macropain) activator subunit 4                               | 252                 | 3.59            |
| 8                      | ENSGALG00000016410, EIF1AY, eukaryotic translation initiation factor 1A, Y-linked                            | 178                 | 5.71            |
| 9                      | ENSGALG00000011738, ARHGDI1, Rho GDP dissociation inhibitor (GDI) beta                                       | 167                 | -4.53           |
| 10                     | ENSGALG00000013045, TUBAL2, TUBA8, testis-specific alpha-tubulin                                             | 94                  | 9.57            |
| 11                     | ENSGALG00000012834, AKR1D1, aldo-keto reductase family 1, member D1 (delta 4-3-ketosteroid-5-beta-reductase) | 98                  | -7.69           |
| 12                     | ENSGALG00000003998, RAB8A, member RAS oncogene family                                                        | 326                 | -2.99           |
| 13                     | ENSGALG00000010207, LARP1B, La ribonucleoprotein domain family, member 1B                                    | 136                 | 4.68            |
| 14                     | ENSGALG00000007307, USP7, ubiquitin specific peptidase 7                                                     | 152                 | 4.56            |
| 15                     | ENSGALG00000006799, AP2A2, adaptor-related protein complex 2, alpha 2 subunit                                | 250                 | -3.28           |
| 16                     | ENSGALG00000007037, PP6R3, Serine/threonine-protein phosphatase 6 regulatory subunit 3                       | 119                 | 4.11            |
| 17                     | ENSGALG00000010235, DDX19B, DEAD (Asp-Glu-Ala-Asp) box polypeptide 19B                                       | 498                 | -2.27           |
| 18                     | ENSGALG00000009641, COL1A2, collagen, type I, alpha 2                                                        | 105                 | -5.13           |
| 19                     | ENSGALG00000023207, H2B1, Histone H2B 1/2/3/4/6                                                              | 149                 | 4.04            |
| 20                     | ENSGALG00000023210, H2B-VII, histone H2B 1/2/3/4/6                                                           | 148                 | 4.04            |

| Adult brain |                                                                                  |              |          |
|-------------|----------------------------------------------------------------------------------|--------------|----------|
|             | Gene                                                                             | Connectivity | log2 m/f |
| 1           | ENSGALG00000009250, HNRNPA3, heterogeneous nuclear ribonucleoprotein A3          | 522          | -0.75    |
| 2           | ENSGALG00000008348, PDIA3, protein disulfide isomerase family A, member 3        | 412          | 0.59     |
| 3           | ENSGALG00000001103, PSMB7, proteasome (prosome, macropain) subunit, beta type, 7 | 618          | -0.70    |
| 4           | ENSGALG00000007615, RAB11A, member RAS oncogene family                           | 438          | 0.46     |
| 5           | ENSGALG00000013990, RPS12, ribosomal protein S12                                 | 325          | -0.51    |
| 6           | ENSGALG00000005694, GARS, glycyl-tRNA synthetase                                 | 319          | -0.56    |
| 7           | ENSGALG00000012233, EIF4E, eukaryotic translation initiation factor 4E           | 535          | 0.36     |
| 8           | ENSGALG00000010238, NAP1L1, nucleosome assembly protein 1-like 1                 | 290          | -0.53    |
| 9           | ENSGALG00000009615, RRP15, ribosomal RNA processing 15                           | 287          | -0.45    |
| 10          | ENSGALG00000003985, TARSL2, threonyl-tRNA synthetase-like 2                      | 194          | 0.63     |
| 11          | ENSGALG00000015450, RAB2A, member RAS oncogene family                            | 404          | 0.43     |
| 12          | ENSGALG00000004133, SRSF10, serine/arginine-rich splicing factor 10              | 157          | -0.58    |
| 13          | ENSGALG00000012402, CUL1, cullin 1                                               | 211          | 0.55     |
| 14          | ENSGALG00000015043, RPF2, ribosome production factor 2                           | 331          | 0.34     |
| 15          | ENSGALG00000009964, YEATS4, YEATS domain containing 4                            | 273          | 0.41     |
| 16          | ENSGALG00000007931, DLD, dihydrolipoamide dehydrogenase                          | 342          | 0.33     |
| 17          | ENSGALG00000008095, KIF23, kinesin family member 23                              | 176          | 0.70     |
| 18          | ENSGALG00000012655, POLR3B, polymerase (RNA) III (DNA directed) polypeptide B    | 232          | 0.45     |
| 19          | ENSGALG00000017254 DLG2, discs, large homolog 2 (Drosophila)                     | 96           | 0.83     |
| 20          | ENSGALG00000011330, DYNC1H1, dynein, cytoplasmic 1, heavy chain 1                | 176          | 0.53     |

**Table S4:** Total number of inparalog groups and the number of groups processed. Note that not all groups could be processed since expression data were in some cases not available for all genes in a cluster. Expected number of inparalog groups from random sampling, and the significance of the observed number of inparalog groups in different categories. A z-score of 2 means 95% confidence interval.

|                                              | <b>gonad adult</b> | <b>gonad embryo</b> | <b>brain adult</b> |
|----------------------------------------------|--------------------|---------------------|--------------------|
| <b>#inparalog groups</b>                     | 133                | 133                 | 133                |
| <b>#processed groups</b>                     | 69                 | 69                  | 69                 |
| <b>#incomplete groups</b>                    | 10                 | 10                  | 10                 |
| <b>#avg. male groups (sd)</b>                | 6.77 (2.44)        | 1.94 (1.33)         | 0.008 (0.09)       |
| <b>#avg. female groups (sd)</b>              | 7.865 (2.59)       | 2.00 (1.35)         | 0.011 (0.10)       |
| <b>#avg. unbiased groups (sd)</b>            | 2.637 (1.59)       | 18.52 (3.68)        | 55.19 (1.85)       |
| <b>#avg. mixed groups (sd)</b>               | 41.728 (3.40)      | 36.536 (3.75)       | 3.791 (1.84)       |
| <b>z-score male</b>                          | 3.38               | 3.81                | -0.09              |
| <b>z-score female</b>                        | 3.92               | 4.46                | -0.11              |
| <b>z-score unbiased</b>                      | 2.12               | 1.76                | 1.52               |
| <b>z-score mixed</b>                         | -6.39              | -4.68               | -1.51              |
| <b>fraction lower than observed male</b>     | 0.997              | 0.997               | 0.00               |
| <b>fraction lower than observed female</b>   | 0.999              | 0.999               | 0.00               |
| <b>fraction lower than observed unbiased</b> | 0.961              | 0.948               | 0.90               |
| <b>fraction lower than observed mixed</b>    | 0.000              | 0.000               | 0.02               |

**Figure S1:** The chicken network is scale-free, manifested by a power-law frequency distribution of node degrees, which becomes linear in a log-log plot.

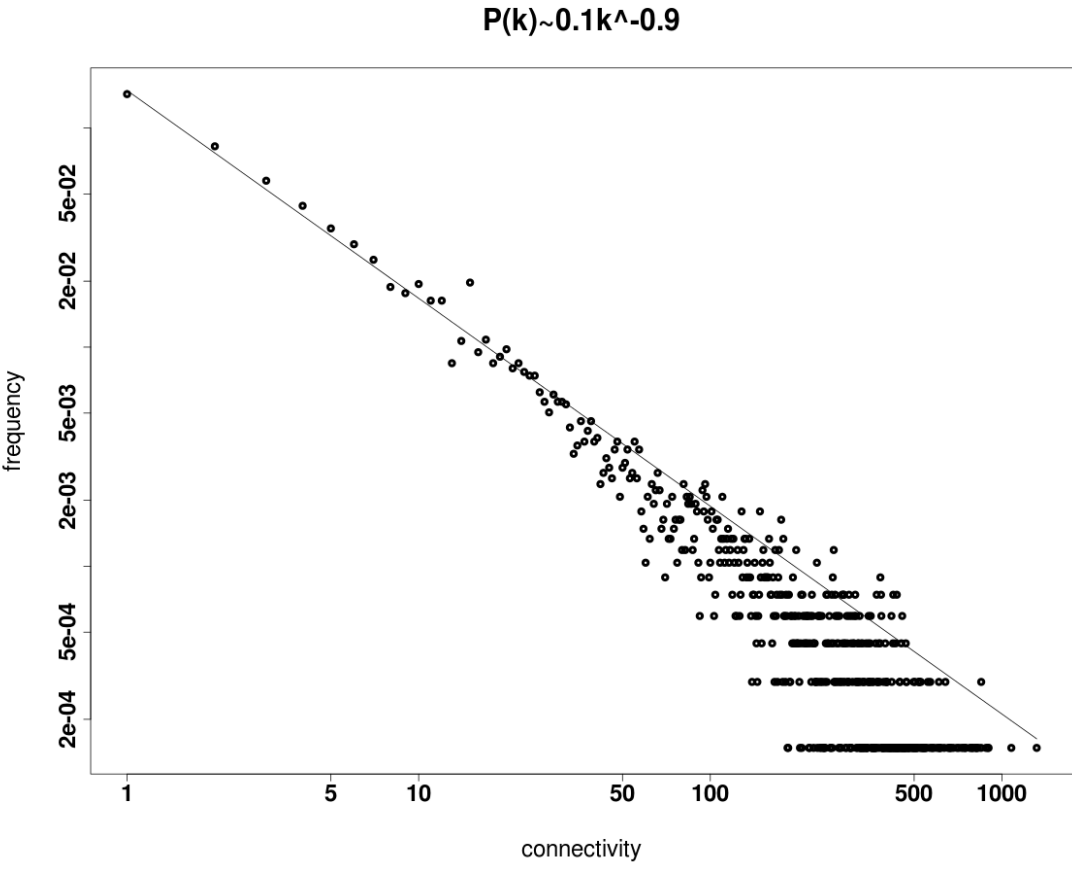

**Figure S2.** Relationship between MCL and MGclus clusters for the male adult gonad in terms of a) genes and b) enriched GO terms.

**a) Shared genes**

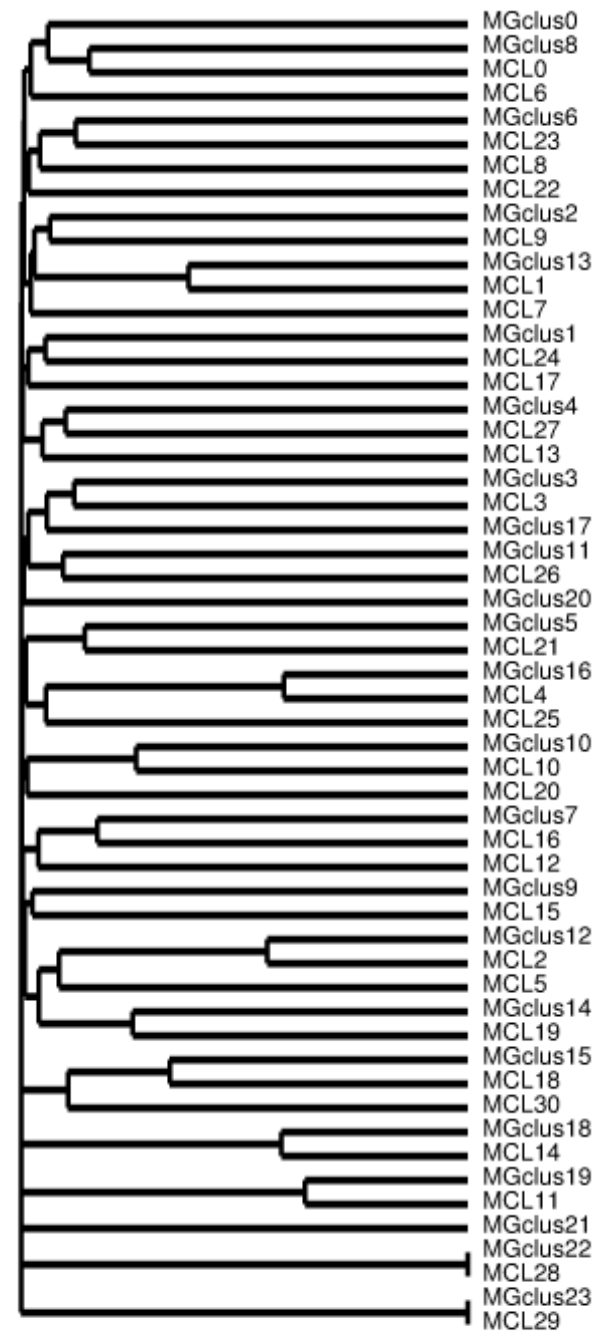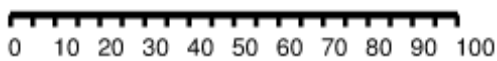

**b) Shared enriched GO terms**

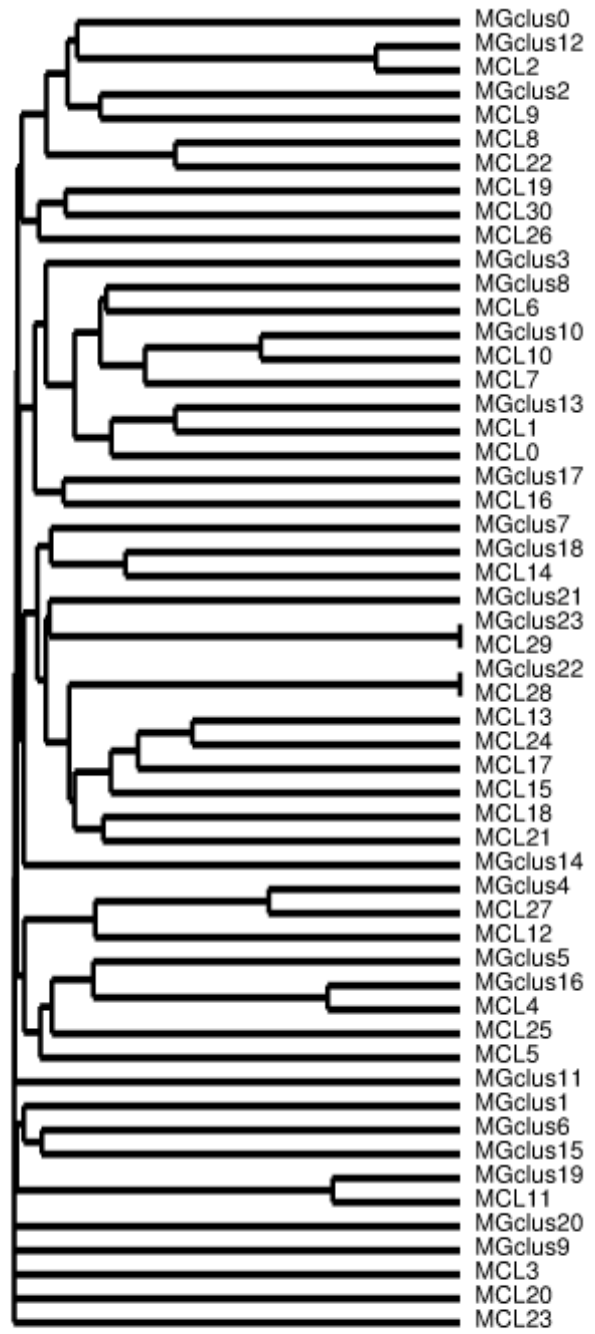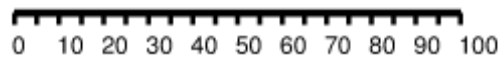

**Figure S3:** Relationship between the MCL and MGclus clusters for the male embryonic gonad in terms of a) genes and b) enriched GO terms.

**a) Shared genes**

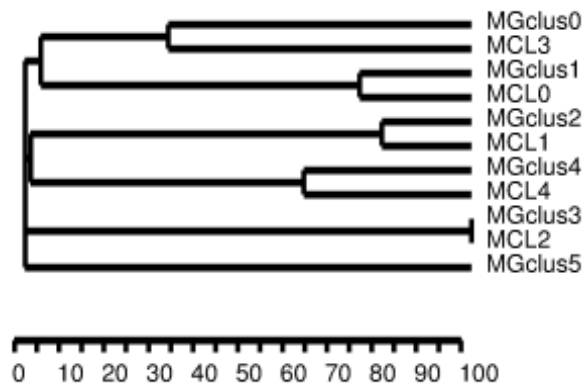

**b) Shared enriched GO terms**

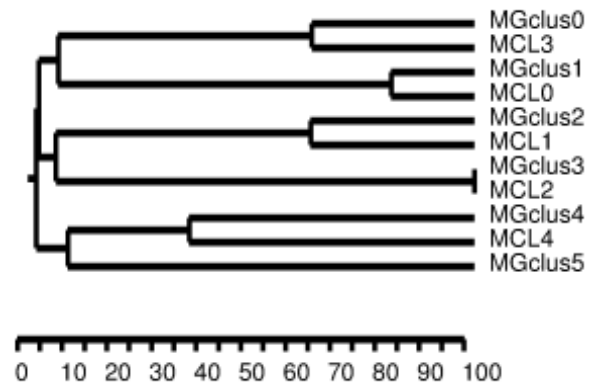

Supplement: f1 [file 130491.f1.pdf]
